# Supplementary material for: Contribution of ammonium nitrate to aerosol optical depth and direct radiative forcing by aerosols over East Asia
Source: Copernicus journal article supplement (doi:10.5194/acp-14-2185-2014), 2014-02-27
Supplement: Supplementary file 1 [file acp-14-2185-2014-supplement.pdf]

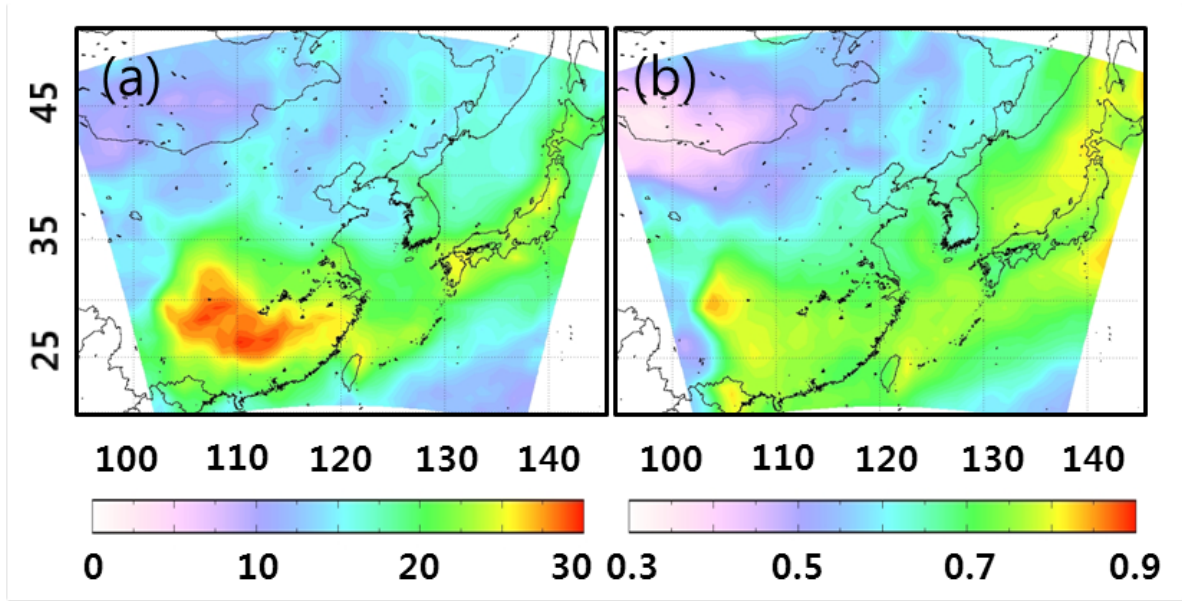

**Figure S1.** Spatial distributions of (a) cloud optical depth (COD) and (b) cloud fraction obtained from MODIS over East Asia for 2006.
